# Supplementary material
Source: PubMed Central journal article supplement (PMC3335190)
Supplement: NIHMS88217-supplement-supplement_1.pdf [file NIHMS88217-supplement-supplement_1.pdf]

**Supplementary Figure**

**Figure E1** Gene ontology clustering of significant genes between respective groups as assessed by DAVID 2007. Numbers represent the percent of our significantly expressed genes in a particular cluster compared to the total number of significant genes. Individual genes may be representative of more than one gene ontologic category (thus total percentages will not add to 100%).

## Band vs. Sham

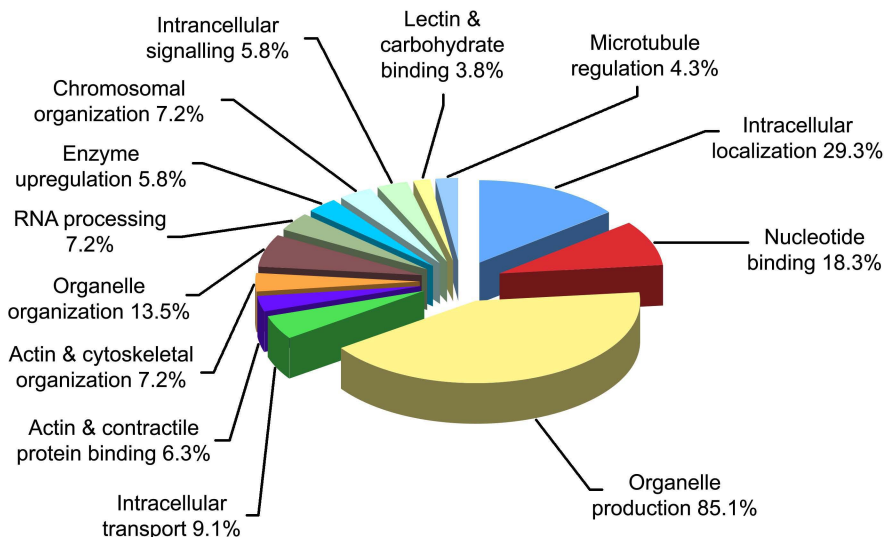

## Deband vs. Band

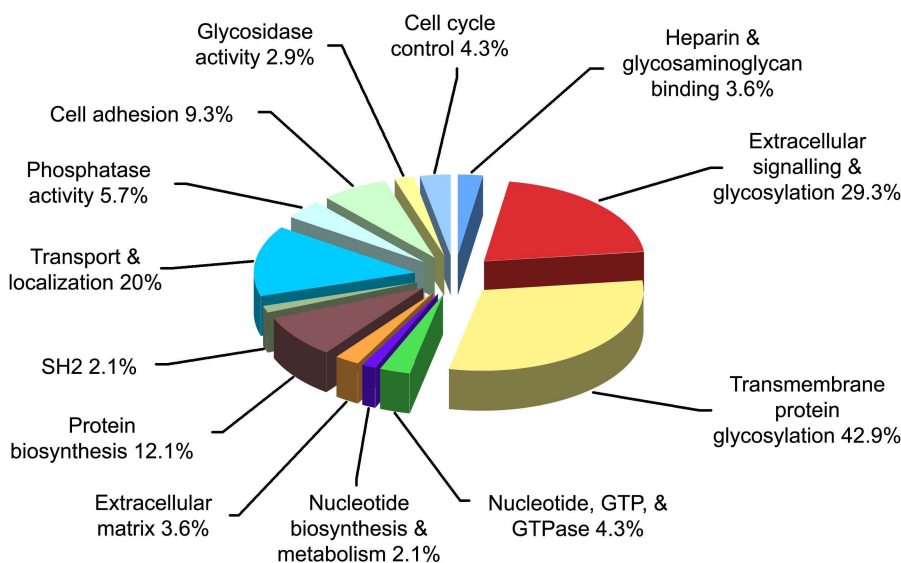

## Deband vs. Sham Deband

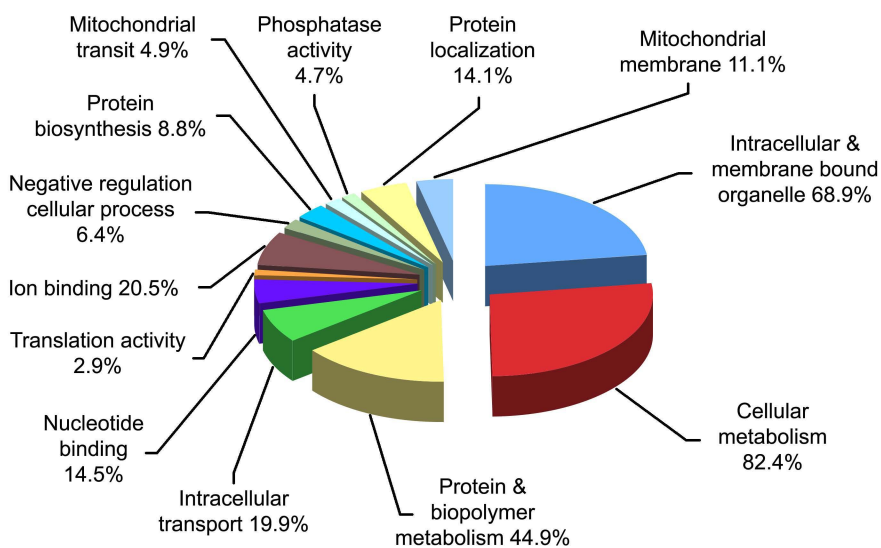

**Table E1 (Supplemental): Echocardiographic measurements at each time points for each of the experimental groups.**

Echocardiographic measurements: IVSd,s, Interventricular septum in diastole and systole; LVIDd,s, Left ventricular internal diameter in diastole and systole; LVPWd,s, Left ventricular posterior wall in diastole and systole; LVFS, Left ventricular fractional shortening; LVEF, left ventricular ejection fraction; LVMass, Left ventricular mass corrected and uncorrected. \*P<0.05 vs. Baseline, †P<0.05 vs. 4wks Banded

|                            | <u>Sham</u>   | <u>Band</u>    | <u>Sham Deband</u> | <u>Deband</u>              |
|----------------------------|---------------|----------------|--------------------|----------------------------|
| <b>Baseline:</b>           |               |                |                    |                            |
| IVS; d (mm)                | 0.63 +/- 0.02 | 0.57 +/- 0.02  | 0.66 +/- 0.02      | 0.56 +/- 0.02              |
| LVID; d (mm)               | 4.2 +/- 0.06  | 4.23 +/- 0.08  | 4.12 +/- 0.08      | 4.14 +/- 0.06              |
| LV PW; d (mm)              | 0.56 +/- 0.02 | 0.57 +/- 0.02  | 0.6 +/- 0.02       | 0.56 +/- 0.02              |
| IVS; s (mm)                | 0.69 +/- 0.02 | 0.67 +/- 0.02  | 0.73 +/- 0.02      | 0.64 +/- 0.02              |
| LVID; s (mm)               | 3.22 +/- 0.09 | 3.16 +/- 0.08  | 3.15 +/- 0.13      | 3.13 +/- 0.1               |
| LV PW; s (mm)              | 0.71 +/- 0.02 | 0.73 +/- 0.03  | 0.72 +/- 0.03      | 0.69 +/- 0.01              |
| LV FS (%)                  | 23.1 +/- 1.2  | 25 +/- 1.8     | 23.5 +/- 1.9       | 23.9 +/- 1.9               |
| LV EF (%)                  | 46.6 +/- 2.1  | 49.5 +/- 2.7   | 47 +/- 3.2         | 47.7 +/- 3.2               |
| LV Mass (mg) (Uncorr.)     | 90.9 +/- 4    | 87.8 +/- 2.7   | 92.9 +/- 2.1       | 83.4 +/- 2.8               |
| LV Mass (mg) (Corr.)       | 72.7 +/- 3.2  | 70.2 +/- 2.2   | 74.3 +/- 1.7       | 66.7 +/- 2.2               |
| <b>4 Weeks Banded:</b>     |               |                |                    |                            |
| IVS; d (mm)                | 0.62 +/- 0.02 | 0.72 +/- 0.02* | 0.66 +/- 0.02      | 0.66 +/- 0.02*             |
| LVID; d (mm)               | 4.23 +/- 0.14 | 4.47 +/- 0.09* | 4.19 +/- 0.07      | 4.44 +/- 0.07*             |
| LV PW; d (mm)              | 0.58 +/- 0.02 | 0.67 +/- 0.02* | 0.59 +/- 0.01      | 0.62 +/- 0.01*             |
| IVS; s (mm)                | 0.68 +/- 0.02 | 0.78 +/- 0.02* | 0.74 +/- 0.02      | 0.73 +/- 0.02*             |
| LVID; s (mm)               | 3.23 +/- 0.16 | 3.58 +/- 0.15* | 3.23 +/- 0.11      | 3.54 +/- 0.11*             |
| LV PW; s (mm)              | 0.71 +/- 0.03 | 0.84 +/- 0.04* | 0.74 +/- 0.03      | 0.77 +/- 0.02*             |
| LV FS (%)                  | 23.6 +/- 1.7  | 20.7 +/- 2.3*  | 23.4 +/- 1.5       | 19.8 +/- 1.8*              |
| LV EF (%)                  | 47.1 +/- 3    | 41.7 +/- 3.7*  | 46.9 +/- 2.4       | 40.4 +/- 3.1*              |
| LV Mass (mg) (Uncorr)      | 92.9 +/- 5.5  | 125 +/- 4.9*   | 97 +/- 1.8         | 109.9 +/- 3*               |
| LV Mass (mg) (Corr)        | 74.3 +/- 4.4  | 100 +/- 3.9*   | 77.6 +/- 1.4       | 87.9 +/- 2.4*              |
| <b>1 Week Debanding:</b>   |               |                |                    |                            |
| IVS; d (mm)                |               |                | 0.69 +/- 0.02      | 0.58 +/- 0.02 <sup>†</sup> |
| LVID; d (mm)               |               |                | 4.23 +/- 0.06      | 4.37 +/- 0.08 <sup>†</sup> |
| LV PW; d (mm)              |               |                | 0.58 +/- 0.01      | 0.58 +/- 0.01 <sup>†</sup> |
| IVS; s (mm)                |               |                | 0.73 +/- 0.02      | 0.66 +/- 0.02 <sup>†</sup> |
| LVID; s (mm)               |               |                | 3.28 +/- 0.07      | 3.47 +/- 0.13 <sup>†</sup> |
| LV PW; s (mm)              |               |                | 0.72 +/- 0.02      | 0.69 +/- 0.02 <sup>†</sup> |
| LV FS (%)                  |               |                | 21.3 +/- 1.2       | 20.3 +/- 1.6               |
| LV EF (%)                  |               |                | 43.5 +/- 2.1       | 41.4 +/- 2.8               |
| LV Mass (mg) (Uncorrected) |               |                | 100.8 +/- 2.2      | 94 +/- 3.7 <sup>†</sup>    |
| LV Mass (mg) (Corrected)   |               |                | 80.6 +/- 1.8       | 75.2 +/- 3 <sup>†</sup>    |

Table E2 – A. (Supplemental): Genes most differentially expressed in each comparison: Deband vs. Band

| Direction (Deband) | Accession No. | Symbol      | Name                                                | Fold $\Delta$ |
|--------------------|---------------|-------------|-----------------------------------------------------|---------------|
| +                  | NM_030679     | Myh1        | myosin, heavy polypeptide 1, skeletal muscle, adult | 2.742         |
| +                  | U01063        | Plk1        | polo-like kinase 1 (Drosophila)                     | 2.475         |
| +                  | NM_016677     | Hpcal1      | hippocalcin-like 1                                  | 2.074         |
| +                  | NM_001012336  | Mdk         | midkine                                             | 2.044         |
| +                  | NM_029948     | Pramef12    | PRAME family member 12                              | 1.979         |
| +                  | NM_147089     | Olfir572    | olfactory receptor 572                              | 1.978         |
| +                  | AK036567      | Mgat5       | mannoside acetylglucosaminyltransferase 5           | 1.962         |
| +                  | AK083490      | Arfp1       | ADP-ribosylation factor related protein 1           | 1.916         |
| +                  | NM_009303     | Syngr1      | synaptogyrin 1                                      | 1.845         |
| +                  | NM_182991     | 5330410G16R | RIKEN cDNA 5330410G16 gene                          | 1.730         |
| +                  | NM_172817     | Zfp647      | zinc finger protein 647                             | 1.713         |
| +                  | NM_007472     | Aqp1        | aquaporin 1                                         | 1.673         |
| +                  | AC124532      | Calcoco1    | calcium binding and coiled coil domain 1            | 1.638         |
| +                  | NM_146201     | Zfp553      | zinc finger protein 553                             | 1.628         |
| +                  | NM_001002272  | Tro         | trophinin                                           | 1.626         |
| +                  | NM_011601     | Tlm         | T lymphoma oncogene                                 | 1.596         |
| +                  | NM_007444     | Amd2        | S-adenosylmethionine decarboxylase 2                | 1.550         |
| +                  | AC155922      | Rps6ka5     | ribosomal protein S6 kinase, polypeptide 5          | 1.538         |
| +                  | XM_925008     | Slc44a5     | solute carrier family 44, member 5                  | 1.538         |
| +                  | AC161037      | Hnrpnl1     | heterogeneous nuclear ribonucleoprotein U-like 1    | 1.530         |
| -                  | NM_020581     | Angptl4     | angiopoietin-like 4                                 | 2.550         |
| -                  | NM_008725     | Nppa        | natriuretic peptide precursor type A                | 2.052         |
| -                  | XM_621314     | Dsp         | desmoplakin                                         | 1.928         |
| -                  | XM_283556     | Fer1f3      | fer-1-like 3, myoferlin (C. elegans)                | 1.758         |
| -                  | NM_001013390  | Scn4b       | sodium channel, type IV, beta                       | 1.701         |
| -                  | NM_021453     | Pga5        | pepsinogen 5, group I                               | 1.651         |
| -                  | NM_024478     | Grpel1      | GrpE-like 1, mitochondrial                          | 1.645         |
| -                  | NM_053176     | Hrg         | histidine-rich glycoprotein                         | 1.625         |
| -                  | NM_019662     | Rrad        | Ras-related associated with diabetes                | 1.623         |
| -                  | NM_171826     | Cldnd1      | claudin domain containing 1                         | 1.614         |
| -                  | NM_133786     | Smc4        | structural maintenance of chromosomes 4             | 1.607         |
| -                  | NM_023733     | Crot        | carnitine O-octanoyltransferase                     | 1.605         |
| -                  | AC1017091     | Lama2       | laminin, alpha 2                                    | 1.601         |
| -                  | NM_029977     | Polq        | polymerase (DNA directed), theta                    | 1.592         |
| -                  | NM_134072     | Akr1c14     | aldo-keto reductase family 1, member C14            | 1.585         |
| -                  | NM_012037     | Vat1        | vesicle amine transport protein 1 homolog           | 1.584         |
| -                  | NM_145406     | Slc10a3     | solute carrier family 10, member 3                  | 1.576         |
| -                  | NM_175277     | Bola3       | bolA-like 3 (E. coli)                               | 1.555         |
| -                  | NM_008961     | Pter        | phosphotriesterase related                          | 1.554         |
| -                  | NM_008937     | Prox1       | prospero-related homeobox 1                         | 1.551         |

Table E2 – B. (Supplemental): Genes most differentially expressed in each comparison: Band vs. Sham

| Direction | Accession No. | Symbol   | Name                                                                    | Fold Δ |
|-----------|---------------|----------|-------------------------------------------------------------------------|--------|
| +         | XM_001002752  | Zc3h7b   | zinc finger CCCH type containing 7B                                     | 1.884  |
| +         | NM_008725     | Nppa     | natriuretic peptide precursor type A                                    | 1.754  |
| +         | NM_007489     | Arntl    | aryl hydrocarbon receptor nuclear translocator-like                     | 1.645  |
| +         | NM_013468     | Ankrd1   | ankyrin repeat domain 1 (cardiac muscle)                                | 1.557  |
| +         | NM_015784     | Postn    | periostin, osteoblast specific factor                                   | 1.534  |
| +         | AC034265      | Ankrd23  | ankyrin repeat domain 23                                                | 1.530  |
| +         | NM_134129     | Prpf19   | PRP19/PSO4 pre-mRNA processing factor 19 homolog                        | 1.497  |
| +         | NM_133357     | Krt75    | keratin 75                                                              | 1.480  |
| +         | NM_010480     | Hsp90aa1 | heat shock protein 90kDa alpha, class A member 1                        | 1.454  |
| +         | NM_031260     | Mov10l1  | Moloney leukemia virus 10-like 1                                        | 1.445  |
| +         | NM_021453     | Pga5     | pepsinogen 5, group I                                                   | 1.445  |
| +         | NM_009221     | Snca     | synuclein, alpha                                                        | 1.439  |
| +         | NM_007564     | Zfp36l1  | zinc finger protein 36, C3H type-like 1                                 | 1.424  |
| +         | NM_172621     | Clic5    | chloride intracellular channel 5                                        | 1.414  |
| +         | NM_133744     | Ccdc71   | coiled-coil domain containing 71                                        | 1.413  |
| +         | NM_178701     | Lrrc8d   | leucine rich repeat containing 8D                                       | 1.410  |
| +         | NM_009007     | Rac1     | RAS-related C3 botulinum substrate 1                                    | 1.394  |
| +         | NM_173442     | Gcnt1    | glucosaminyl (N-acetyl) transferase 1, core 2                           | 1.388  |
| +         | NM_029614     | Prss23   | protease, serine, 23                                                    | 1.378  |
| +         | NM_008524     | Lum      | lumican                                                                 | 1.365  |
|           |               |          |                                                                         |        |
| -         | NM_007606     | Car3     | carbonic anhydrase 3                                                    | 2.672  |
| -         | NM_030679     | Myh1     | myosin, heavy polypeptide 1, skeletal muscle, adult                     | 2.131  |
| -         | NM_010005     | Cyp2d10  | cytochrome P450, family 2, subfam. d, polypeptide 10                    | 2.051  |
| -         | NM_009416     | Tpm2     | tropomyosin 2, beta                                                     | 2.016  |
| -         | U01063        | Plk1     | polo-like kinase 1 (Drosophila)                                         | 1.982  |
| -         | NM_017370     | Hp       | haptoglobin                                                             | 1.971  |
| -         | NM_147089     | Olfr572  | olfactory receptor 572                                                  | 1.925  |
| -         | NM_001012336  | Mdk      | midkine                                                                 | 1.911  |
| -         | NM_011066     | Per2     | period homolog 2 (Drosophila)                                           | 1.867  |
| -         | BC004722      | Malat1   | metastasis associated lung adenocarcinoma transcript 1 (non-coding RNA) | 1.859  |
| -         | NM_013900     | Mfi2     | antigen p97 (melanoma associated)                                       | 1.727  |
| -         | NM_010404     | Hap1     | huntingtin-associated protein 1                                         | 1.627  |
| -         | NM_177709     | Tusc5    | tumor suppressor candidate 5                                            | 1.597  |
| -         | XM_981394     | Rhobtb1  | Rho-related BTB domain containing 1                                     | 1.586  |
| -         | AK083490      | Arfrp1   | ADP-ribosylation factor related protein 1                               | 1.567  |
| -         | NM_016693     | Map3k6   | mitogen-activated protein kinase kinase kinase 6                        | 1.562  |
| -         | NM_009920     | Cnih2    | cornichon homolog 2 (Drosophila)                                        | 1.549  |
| -         | NM_025866     | Cdca7    | cell division cycle associated 7                                        | 1.534  |
| -         | NM_001025156  | Ccdc93   | coiled-coil domain containing 93                                        | 1.524  |
| -         | NM_009119     | Sap18    | Sin3-associated polypeptide 18                                          | 1.520  |

Table E2 - C (Supplemental): Genes most differentially expressed in each comparison: Deband vs. Sham Deband

| Direction | Accession No. | Symbol   | Name                                                    | Fold Δ |
|-----------|---------------|----------|---------------------------------------------------------|--------|
| +         | NM_133777     | Ube2s    | ubiquitin-conjugating enzyme E2S                        | 1.967  |
| +         | AK036567      | Mgat5    | mannoside acetylglucosaminyltransferase 5               | 1.731  |
| +         | NM_029948     | Pramef12 | PRAME family member 12                                  | 1.704  |
| +         | NM_011202     | Ptpn11   | protein tyrosine phosphatase, non-receptor type 11      | 1.620  |
| +         | NM_144791     | Tor1aip1 | torsin A interacting protein 1                          | 1.507  |
| +         | AB009392      | Hnrpl    | heterogeneous nuclear ribonucleoprotein L               | 1.505  |
| +         | NM_010890     | Nedd4    | neural precursor cell, developmentally down-reg gene 4  | 1.501  |
| +         | NM_028004     | Ttn      | titin                                                   | 1.497  |
| +         | NM_001024955  | Pik3r1   | phosphatidylinositol 3-kinase, reg. sub., polypeptide 1 | 1.496  |
| +         | NM_008609     | Mmp15    | matrix metalloproteinase 15                             | 1.492  |
| +         | NM_146087     | Csnk1a1  | casein kinase 1, alpha 1                                | 1.483  |
| +         | NM_173364     | Zfp445   | zinc finger protein 445                                 | 1.480  |
| +         | NM_025403     | Nola3    | nucleolar protein family A, member 3                    | 1.472  |
| +         | NM_152134     | Homer1   | homer homolog 1 (Drosophila)                            | 1.469  |
| +         | NM_011601     | Tlm      | T lymphoma oncogene                                     | 1.466  |
| +         | NM_009652     | Akt1     | thymoma viral proto-oncogene 1                          | 1.464  |
| +         | NM_146201     | Zfp553   | zinc finger protein 553                                 | 1.464  |
| +         | NM_173028     | Vps13a   | vacuolar protein sorting 13A (yeast)                    | 1.464  |
| +         | NM_008714     | Notch1   | Notch gene homolog 1 (Drosophila)                       | 1.447  |
| +         | NM_029657     | Mgrn1    | mahogunin, ring finger 1                                | 1.445  |
| -         | NM_020581     | Angptl4  | angiopoietin-like 4                                     | 1.875  |
| -         | NM_001013390  | Scn4b    | sodium channel, type IV, beta                           | 1.744  |
| -         | XM_001001760  | Gan      | giant axonal neuropathy                                 | 1.671  |
| -         | NM_145741     | Gdf10    | growth differentiation factor 10                        | 1.651  |
| -         | NM_178882     | D2hgdh   | D-2-hydroxyglutarate dehydrogenase                      | 1.578  |
| -         | NM_012037     | Vat1     | vesicle amine transport protein 1 homolog               | 1.572  |
| -         | XM_001006025  | Rpl19    | ribosomal protein L19                                   | 1.558  |
| -         | NM_010937     | Nras     | neuroblastoma ras oncogene                              | 1.553  |
| -         | NM_008937     | Prox1    | prospero-related homeobox 1                             | 1.540  |
| -         | XM_915717     | Ube2e1   | ubiquitin-conjugating enzyme E2E 1, UBC4/5 homolog      | 1.539  |
| -         | XR_001538     | Tfb2m    | transcription factor B2, mitochondrial                  | 1.527  |
| -         | NM_053176     | Hrg      | histidine-rich glycoprotein                             | 1.524  |
| -         | NM_025276     | Evpl     | envoplakin                                              | 1.520  |
| -         | AK041640      | Zfpn1a4  | zinc finger protein, subfamily 1A, 4 (Eos)              | 1.517  |
| -         | NM_019794     | Dnaja2   | DnaJ (Hsp40) homolog, subfamily A, member 2             | 1.516  |
| -         | XM_621314     | Dsp      | desmoplakin                                             | 1.514  |
| -         | NM_027777     | Pex1     | peroxisome biogenesis factor 1                          | 1.505  |
| -         | NM_007666     | Cdh6     | cadherin 6                                              | 1.502  |
| -         | NM_133786     | Smc4     | structural maintenance of chromosomes 4                 | 1.501  |
| -         | NM_012010     | Eif2s3x  | eukaryotic translation initiation factor 2, subunit 3   | 1.491  |

**Table E3 (Supplemental): Significant gene ontologies and GSEA categories identified by SAFE analysis in LVH regression (excluding those identified in LVH progression)**

| <u>GO Categories</u> |                                                      | <u>GSEA Categories</u>                |
|----------------------|------------------------------------------------------|---------------------------------------|
| GO:0015629           | actin cytoskeleton                                   | actin pathway                         |
| GO:0007411           | axon guidance                                        | adrenergic                            |
| GO:0003824           | catalytic activity                                   | akt pathway                           |
| GO:0006968           | cellular defense response                            | alk pathway                           |
| GO:0004197           | cysteine-type endopeptidase activity                 | bcl2 family and reg network           |
| GO:0004519           | endonuclease activity                                | carm-er pathway                       |
| GO:0005789           | endoplasmic reticulum membrane                       | cell cycle                            |
| GO:0016251           | RNA polymerase II transcription factor               | creb pathway                          |
| GO:0004364           | glutathione transferase activity                     | death pathway                         |
| GO:0006811           | ion transport                                        | differentiation pathway in PC12 cells |
| GO:0007254           | JNK cascade                                          | erk5 pathway                          |
| GO:0000287           | magnesium ion binding                                | G alpha I pathway                     |
| GO:0006120           | mitochondrial electron transport, NADH to ubiquinone | glutamine down                        |
| GO:0005554           | molecular_function unknown                           | il2rb pathway                         |
| GO:0008137           | NADH dehydrogenase (ubiquinone)                      | IL4 receptor in B-lymphocytes         |
| GO:0003954           | NADH dehydrogenase activity                          | INS                                   |
| GO:0045786           | negative regulation of cell cycle                    | interleukin 4 pathway                 |
| GO:0009968           | negative regulation signal transduction              | mapk pathway                          |
| GO:0030182           | neuron cell differentiation                          | monocyte pathway                      |
| GO:0005643           | nuclear pore                                         | mRNA processing                       |
| GO:0000786           | nucleosome                                           | mRNA splicing                         |
| GO:0005634           | nucleus                                              | mtor pathway                          |
| GO:0016491           | oxidoreductase activity                              | p53 hypoxia pathway                   |
| GO:0003755           | peptidyl-prolyl cis-trans isomerase                  | p53 signalling                        |
| GO:0007204           | positive regulation of cytosolic [Ca <sup>++</sup> ] | phosphoinositide-3-kinase pathway     |
| GO:0006470           | protein amino acid dephosphorylation                 | PIP3 signaling in B lymphocytes       |
| GO:0006412           | protein biosynthesis                                 | protein modification                  |
| GO:0006457           | protein folding                                      | ptdins pathway                        |
| GO:0004722           | protein serine/threonine phosphatase                 | pyruvate metabolism                   |
| GO:0004725           | protein tyrosine phosphatase activity                | rarrxr pathway                        |
| GO:0016567           | protein ubiquitination                               | RNA polymerase                        |
| GO:0015992           | proton transport                                     | stress pathway                        |
| GO:0008217           | regulation of blood pressure                         | tid pathway                           |
| GO:0042127           | regulation of cell proliferation                     | wnt pathway                           |
| GO:0006446           | regulation of translational initiation               |                                       |
| GO:0006950           | response to stress                                   |                                       |
| GO:0005840           | ribosome                                             |                                       |
| GO:0003723           | RNA binding                                          |                                       |
| GO:0008380           | RNA splicing                                         |                                       |
| GO:0006814           | sodium ion transport                                 |                                       |
| GO:0030528           | transcription regulator activity                     |                                       |
| GO:0003743           | translation initiation factor activity               |                                       |
| GO:0006512           | ubiquitin cycle                                      |                                       |
| GO:0000151           | ubiquitin ligase complex                             |                                       |
| GO:0006511           | ubiquitin-dependent protein catabolism               |                                       |
| GO:0004842           | ubiquitin-protein ligase activity                    |                                       |
| GO:0030018           | Z disc                                               |                                       |
| GO:0008270           | zinc ion binding                                     |                                       |

**Table E4 (Supplemental): Significant gene ontologies and GSEA categories identified by SAFE analysis in both LVH progression and regression**

---

|            |                                                          |
|------------|----------------------------------------------------------|
| GO:0005516 | calmodulin binding                                       |
| GO:0003677 | DNA binding                                              |
| GO:0005874 | microtubule                                              |
| GO:0005762 | mitochondrial large ribosomal subunit                    |
| GO:0003704 | specific RNA polymerase II transcription factor activity |
| GO:0004221 | ubiquitin thiolesterase activity                         |
